# Supplementary figures and images for: Hydrogen sulfide stimulates xanthine oxidoreductase conversion to nitrite reductase and formation of NO
Source: PubMed Central journal article supplement — Redox Biol. 2020 Jan 30;34:101447. doi: 10.1016/j.redox.2020.101447 (PMC7327988; doi:10.1016/j.redox.2020.101447), 2020-01-30

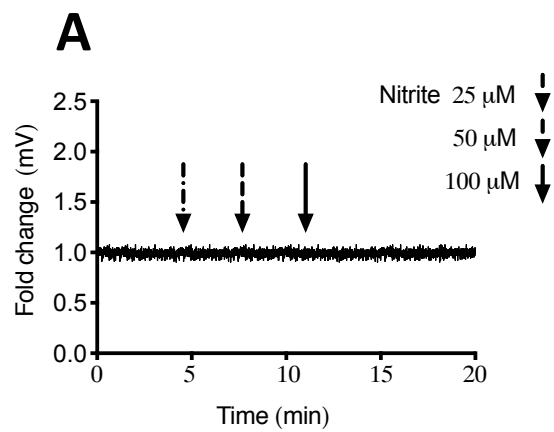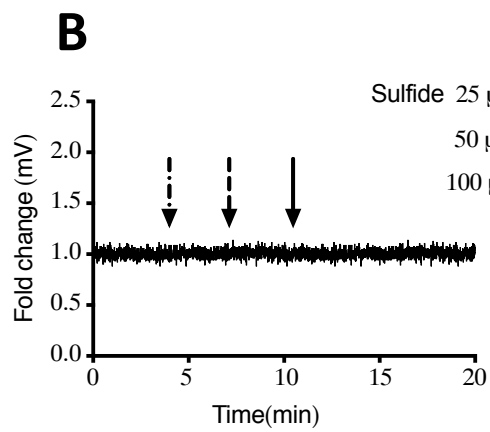

**Supplementary figure 1**

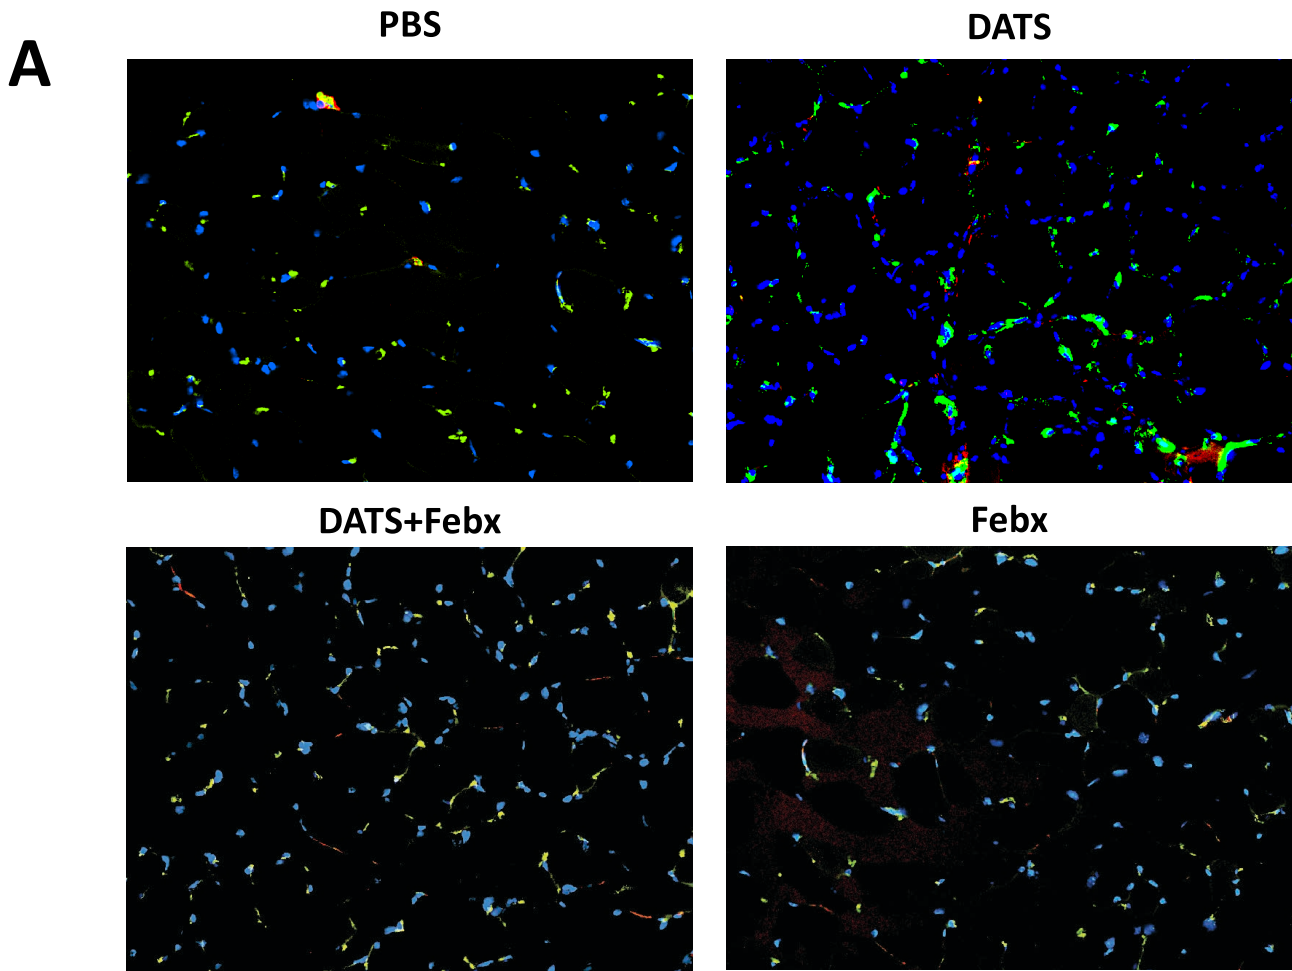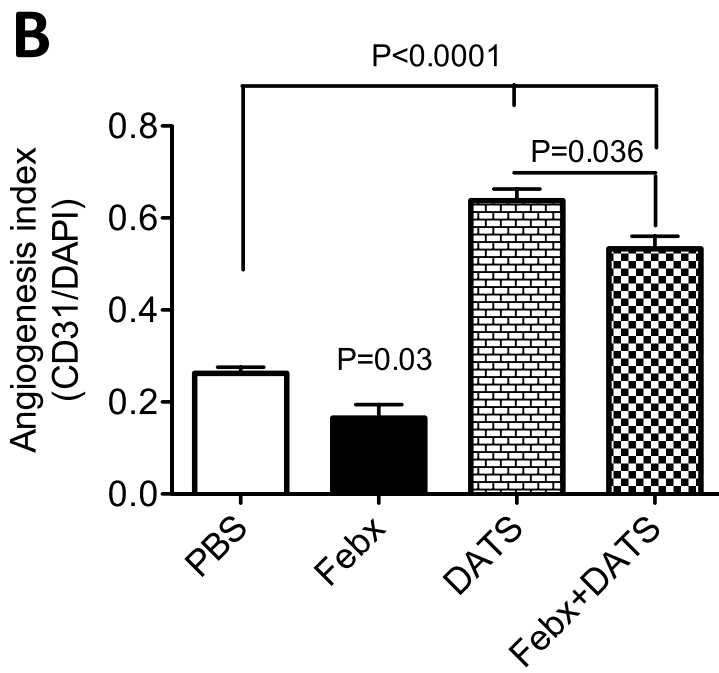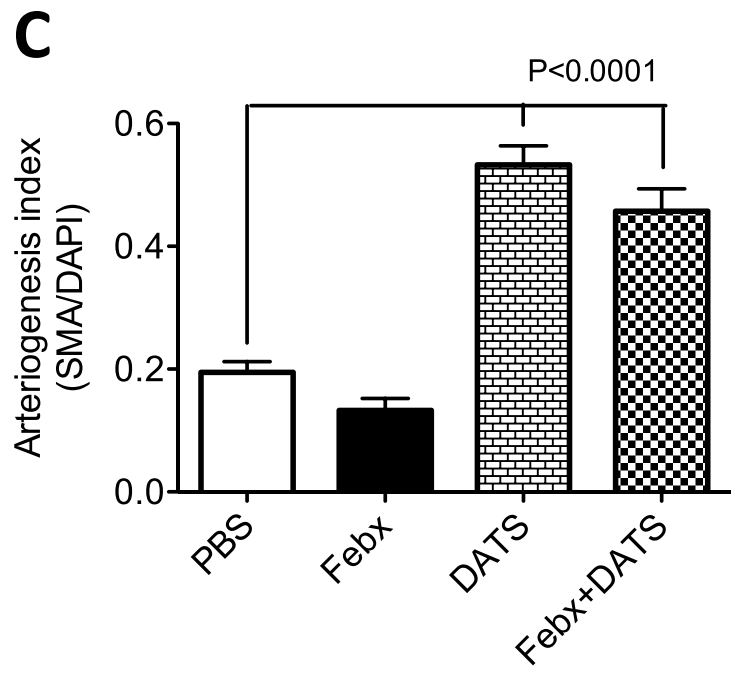

Supplementary figure 2

Supplement: mmc1.pdf [file mmc1.pdf]
